RESEARCH ARTICLE

# Citrus tristeza virus (CTV) Causing Proteomic and Enzymatic Changes in Sweet Orange Variety “Westin”

Milena Santos Dória<sup>1</sup>, Aurizângela Oliveira de Sousa<sup>1</sup>, Cristiane de Jesus Barbosa<sup>2</sup>, Márcio Gilberto Cardoso Costa<sup>1</sup>, Abelmon da Silva Gesteira<sup>2</sup>, Regina Martins Souza<sup>1</sup>, Ana Camila Oliveira Freitas<sup>1</sup>, Carlos Priminho Pirovani<sup>1\*</sup>

**1** Centro of Biotecnologia and Genetica, Universidade Estadual de Santa Cruz, UESC, Rodovia Ilhéus-Itabuna, Km 16, Ilhéus/BA, 45662–000, Brasil, **2** Embrapa Mandioca e Fruticultura, CEP 44380–000, Cruz das Almas, BA, Brazil

\* [pirovani@uesc.br](mailto:pirovani@uesc.br)

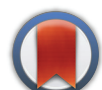

CrossMark  
click for updates

OPEN ACCESS

**Citation:** Dória MS, Sousa AOd, Barbosa CdJ, Costa MGC, Gesteira AdS, Souza RM, et al. (2015) *Citrus tristeza virus* (CTV) Causing Proteomic and Enzymatic Changes in Sweet Orange Variety “Westin”. PLoS ONE 10(7): e0130950. doi:10.1371/journal.pone.0130950

**Editor:** Wei Wang, Henan Agricultural University, CHINA

**Received:** April 20, 2015

**Accepted:** May 27, 2015

**Published:** July 24, 2015

**Copyright:** © 2015 Dória et al. This is an open access article distributed under the terms of the [Creative Commons Attribution License](http://creativecommons.org/licenses/by/4.0/), which permits unrestricted use, distribution, and reproduction in any medium, provided the original author and source are credited.

**Data Availability Statement:** All relevant data are within the paper and its Supporting Information files.

**Funding:** MSD was supported by the Coordenação de Perfeccionamento de Pessoal de Nível Superior (CAPES). CPP was supported by the Conselho Nacional de Desenvolvimento Científico e Tecnológico (CNPq)(<http://www.cnpq.br>, Process number 305309/2012-9). The authors thank Fundação de Amparo à Pesquisa do Estado da Bahia (FAPESB) and Programa de Pós-graduação em Biologia e Biotecnologia de Micro-organismos (<http://www.fapesb.ba.gov.br/>) and the and

## Abstract

Citrus Tristeza disease, caused by CTV (*Citrus tristeza virus*), commits citrus plantations around the world and specifically attacks phloem tissues of the plant. The virus exists as a mixture of more or less severe variants, which may or may not cause symptoms of Tristeza. The objective of this study was to analyze the changes caused by CTV in the proteome of stems of sweet orange, as well as in the activity and gene expression of antioxidant enzymes. The CTV-infected sweet orange displayed mild symptoms, which were characterized by the presence of sparse stem pitting throughout their stems. The presence of virus was confirmed by RT-PCR. Proteomic analysis by 2DE-PAGE-MS / MS revealed the identity of 40 proteins differentially expressed between CTV- infected and -non-infected samples. Of these, 33 were up-regulated and 7 were down-regulated in CTV-infected samples. Among the proteins identified stands out a specific from the virus, the coat protein. Other proteins identified are involved with oxidative stress and for this their enzymatic activity was measured. The activity of superoxide dismutase (SOD) was higher in CTV-infected samples, as catalase (CAT) showed higher activity in uninfected samples. The activity of guaiacol peroxidase (GPX) did not vary significantly between samples. However, ascorbate peroxidase (APX) was more active in the infected samples. The relative expression of the genes encoding *CAT*, *SOD*, *APX* and *GPX* was analyzed by quantitative real time PCR (RT-qPCR). The CTV-infected samples showed greater accumulation of transcripts, except for the *CAT* gene. This gene showed higher expression in the uninfected samples. Taken together, it can be concluded that the CTV affects the protein profile and activity and gene expression of antioxidant enzymes in plants infected by this virus.

CNPq (PRONEM, Process number PNE0005/2011) for the financial support. The funders had no role in study design, data collection and analysis, decision to publish, or preparation of the manuscript.

**Competing Interests:** The authors have declared that no competing interests exist.

## Introduction

Among the fruits which are consumed raw and used industrially, citrus fruits represent the main world demand [1]. Brazilian economy benefits highly from the farming of those fruits, mainly in respect of the production of oranges, as Brazil stands out as one of its main producers in the world, and is responsible for exporting around US\$ 7.8 billion worth of concentrated and frozen orange juice a year. Around 60% of the orange juice consumed in the world comes from Brazilian orchards, which dominate the international market for that fruit [2].

The losses caused by diseases represent a major problem for citriculture. Tristeza is one of those diseases which affect citriculture throughout the world [3]. The disease is caused by *Citrus tristeza virus* (CTV), a member of genus *Closterovirus* which belongs to family *Closteroviridae* [4]. Symptoms caused by CTV may vary, and they depend on the host's characteristics. Some genotypes are tolerant of the virus, whereas some others are resistant. Resistant plants do not multiply the virus—if they do, it is a much reduced multiplication. In turn, tolerant plants allow for that multiplication, but they tolerate the virus presence in their tissues, but do not develop symptoms of the disease [5].

CTV attacks phloem tissues of plants in *Rutaceae* family, mainly of the genus *Citrus* [4]. In susceptible scion/rootstock combinations, the virus causes classic symptoms, such as mature leaf yellows, rotting of roots, and even plant death. However, in tolerant plants those symptoms do not appear. In that case, stem pitting may be formed. They are flutes or buttresses on the bark [6]. Besides that, the infection causes phloem degeneration in intolerant plants, which may lead them to die [6].

Plants facing biotic stress, such as viral infections, generally react with changes in their protein profile [7] or develop a secondary response, such as increased oxidative stress due to the production of reactive oxygen species (ROS) [8]. When that happens, plants use a set of enzymes and antioxidant substances such as ascorbate, for example, to combat those ROS and to reduce the damage they cause to cells [9]. Virus characteristics [10], existing strains [11] and symptoms of sick plants [4] have already been described, but there are no proteomic studies yet on the Citrus x CTV interaction.

In this study, the protein profiles of non- and infected sweet orange variety “Westin” by CTV varieties were analyzed and compared. Some identified proteins were induced through the interaction between CTV and sweet orange variety “Westin”, and the activity of enzymes involved with the oxidative stress was different when the two treatments were compared. The standard coding gene expression of some of those enzymes was correlated to the enzyme activity, as well as with the standard accumulation of some isoforms identified through ms/ms.

## Materials and Methods

### Plant material and cultivation conditions

Plants were obtained from the Embrapa Mandioca e Fruticultura (EMBRAPA). Samples were obtained from four infected adult plants naturally infected and four non infected adult plants cultivated in a greenhouse with eight years of age in average, of sweet orange variety “Westin” (*Citrus sinensis* (L.) Osbeck.). From each plant, two samples of young stem branches measuring from 0.3 to 0.7 mm in diameter were taken. Those branches were cut in pieces of approximately 5 cm, and immediately inserted in liquid nitrogen. Then, they were freeze-dried and stored at -20°C until the extraction were conducted.

## Evaluation of symptoms

To evaluate the incidence and severity of stem pitting symptoms, 10 branches from each plant used were collected in different parts of plant scions, randomly. They measured approximately 20 cm in length. Those branches were submitted to a temperature of 120°C for 15 minutes in an autoclave. Barks were removed, and branches were then evaluated using a rating scale [12].

## Nucleic acid extraction, synthesis of cDNA, RT-PCR and RT-qPCR

Total RNA was extracted from a pool composed of stem branches from four different plants. The branches were peeled, and barks were macerated in liquid nitrogen and 0.07% / g of Polyvinylpyrrolidone (PVPP) tissue. Different rates were used to extract RNA and proteins. RNA extraction was conducted through ZR Plant RNA Miniprep kit (ZymoResearch), according to the manufacturer's instructions. Sample integrity and quality were confirmed through an analysis with agarose gel at 0.8%. They were qualified in a NanoDrop. Samples were treated with RNase-Free DNase (Fermentas Life Science). Two cDNAs were synthesized, one for the semi-quantitative PCR reaction (RT-PCR) and another for the quantitative PCR reaction (RT-qPCR) using Revert Aid H Minus kit (Fermentas—First Strand cDNA Synthesis Kit). For those syntheses, 1 µg RNA in each reaction, a random primer for RT-PCR analysis, and an oligo-dT primer for RT-qPCR analysis were used. Reverse transcription reaction was conducted in a PTC-200 Thermal Cycler (Peltier Thermal Cycler), at 60°C for one hour. After the synthesis, both cDNAs were quantified in a NanoDrop.

The RT-PCR with specific primers for CTV [13] was conducted with cDNA from symptomatic and asymptomatic plants (S1 Table). In order to do that, 3 µL of cDNA synthesized for a 50 µL reaction containing 5 units of Taq DNA polymerase, 2.5 mM of MgCl<sub>2</sub>, 0.8 mM of dNTP, and 5 mM of each sense and antisense primer. The amplification conditions were: 1 step at 94°C for 2 minutes, 30 cycles at 94°C for 30 seconds, 55°C for 30 seconds, and 72° for 45 seconds, followed by a step at 72°C for 5 minutes. PCR products were analyzed through a 1% agarose gel electrophoresis.

RT-qPCR was conducted in order to assess the relative abundance of transcripts from some of the genes related to oxidative stress in the plants of each treatment (infected and non-infected branches). RT-qPCR reactions were conducted in five replicates from the tissue pool of four plants, and the volume used in the reaction was 22 µL, containing 100 ng of cDNA, 1 µL of each primer (R+F) 10 µmol.L<sup>-1</sup> and 11 µL of Maxima SYBR Green/ROX qRT-PCR Master Mix (2X) (Fermentas). The amplification cycling was conducted in the following steps: 50°C for 2 minutes, 95°C for 10 minutes, 95°C for 15 seconds, and 60°C for 1 minute. These steps were repeated over 40 cycles. After the gene amplification cycling, the products were dissociated in order to confirm the formation of unique and specific products. In this case, the steps conducted presented the following characteristics: 95°C for 15 seconds, 60°C for 1 minute, and 95°C for 1 second. The expression was quantified through the use of method  $2^{-\Delta\Delta Ct}$  [14]. The specific primers for each gene are presented in Table 1.

## Protein extraction and quantification

A mass of approximately 0.4 g of the material from the pool of four plants, which were previously and macerated in liquid nitrogen, was used. Proteins were extracted according Pirovani *et al.* [15] using a procedure based on the conduction of successive washings, associated with the sonication steps. Phenol and dense SDS were also used. The precipitated proteins were re-suspended in a rehydration buffer (6 mol.L<sup>-1</sup> of urea, 2 mol.L<sup>-1</sup> thiourea, 2% CHAPS, and 0.002% of bromophenol blue), and stored at -20°C until used. Proteins were quantified with a 2D-Quant kit (GE HealthCare), as per the manufacturer's instructions.

**Table 1. Sequence of primers used in real-time PCR reactions (qRT-PCR) and in RT-PCR reactions.**

| Organism | Primer    | Sequence (Forward /Reverse)                                                                                       |
|----------|-----------|-------------------------------------------------------------------------------------------------------------------|
| Citrus   | UPL7      | 5'CAAAGAAGTGCAGCGAGAGA -3'/5'-TCAGGAACAGCAAAGCAAG -3'                                                             |
|          | SOD       | 5'-TAGGCTTGGGTAATCCGTAGGA-3'/5'-CTAATCGCCGGCTCCAAAG-3'                                                            |
|          | CAT       | 5'-CCGATCACGAGGACCAATTT-3'/5'-TTCAAGACCAAGCGTCCAAC-3'                                                             |
|          | GPX       | 5'-GCTTGGAGATTCTGGCCTTTC-3'/5'-TCAGCCTTAAAGCGAGTGCAT-3'                                                           |
|          | APX       | 5'-TATTGCCGTTAGGCTTTTGA-3'/5'-GGTAACCTCAACGCCAACAAAC-3'                                                           |
| CTV      | CN487/489 | <sup>697</sup> 5'- GCGTTGGATGATATCCTTCGCTGG-3' <sup>720/1082</sup> 5'- AATTRTTCCGSCAGGACGGAACA-3' <sup>1105</sup> |
|          | CN488/491 | <sup>1082</sup> 5'- TGTTCGTCCTGSGCGGAAYAATT-3' <sup>1105/1461</sup> 5'- GTGTARGTCCRCGCATMGAACC-1484               |

doi:10.1371/journal.pone.0130950.t001

## 2—DE and comparative proteome analysis

A mass of 500 µg of proteins was homogenized in a rehydration buffer containing DTT (50 mmol.L<sup>-1</sup>) and ampholytes at 0.5% for pH of 3–10 NL (non-linear) (Amersham Biosciences) with its volume adjusted for 250 µL with the use of a rehydration buffer. The samples were applied on 13-cm gel strips with immobilized pH, which varied from 3 to 10 NL (Amersham Biosciences, Immobiline Dry-Strip). The strips were focused using EttanIPGhor3 (GE Healthcare), which was controlled by software Ettan IPGhor3, as per the following parameters: 12 hours of rehydration at 20°C and approximately 5 hour of focusing (500V- 60 min; 1000V- 64 min; 8000V-150 min; 8000V- 40 minutes). At the end of the focusing process, the strips were placed in a buffer solution (6 mol.L<sup>-1</sup> of urea, 75 mmol.L<sup>-1</sup> of Tris-HCl pH 8.8, 30% glycerol, 2% SDS, 0.002% bromophenol blue) a -80°C until they were used.

After the strips were focused, they were treated with DTT (50 mM Tris-HCl buffer (pH 8.8), 6 M urea, 30% glycerol, 2% SDS, 1% dithiothreitol-DTT, a trace of bromophenol blue), and Iodoacetamide (50 mM Tris-HCl buffer (pH 8.8), 6 M urea, 30% glycerol, 2% SDS, 1% iodoacetamide, a trace of bromophenol blue) for fifteen minutes each, and placed on top of a 12% polyacrylamide gel, and sealed with an agarose solution (25 mmol.L<sup>-1</sup> of Tris base, 192 mmol.L<sup>-1</sup> of glycine, 0.1% SDS, 0.5% agarose, 0.002% bromophenol blue).

The run was performed until the bromophenol blue arrived at the end of the gel, according the following parameters: (1) 15 mA for 15 minutes, (2) 40 mA for 30 minutes, and (3) 50 mA for 3 hours. After the run, the gels were fixed in a buffer solution containing ethanol 40% and acetic acid 10% for 1 hour, and visualized with 0.08% Coomassie blue G-250 (w/v) [16]. The gels were dyed for 7 days under agitation. After that period, they were discolored through successive washings with distilled water, and then kept in acetic acid at 7%.

## Image acquisition and data analysis

Gel images were obtained through LabScanner (Amersham Bioscience), and analyzed with software Image Master 2D Platinum 7.0 (GE Healthcare). This program allows obtaining the number of spots in each gel, to characterize the isoelectric point values and molecular mass, and it also allows obtaining the expression levels of the spots in the gels.

The gels were replicated three times for each sample (S2 and S3 Figs), in order to increase the reproducibility of the analysis. In each treatment, a gel with a higher correlation coefficient with the two remaining gels. All gels were juxtaposed, so the spots could be automatically recognized in all gels analyzes, and, when necessary, some manual editions were performed. The protein profiles of the gels were analyzed and compared.

## MS- based spot identification

The spots selected for identification were excised from gel 2DE and submitted to tryptic digestion as per Shevchenko *et al.* [17]. The solution containing the proteolytic digestion was fragmented through reversed-phase chromatography in a nanoAcquity UPLC (WATERS) attached to the mass spectrometer Q-ToF micro (Waters), according to Oliveira *et al.* [18]. The obtained spectra were analyzed using software ProteinLynx v2.3 and compared against the NCBI's database—the tool used was MASCOT MS/MS IonSearch ([www.matrixscience.com](http://www.matrixscience.com)), using the following parameters: digestion through trypsin enzyme, with one lost cleavage site, carbamidomethylation of cysteines (Cys) as fixed and variable modification to methionine (Met) oxidation, tolerable error of 30 ppm, mass error tolerance of 0.3 Da and 0.1 Da for fragmented ion error. After the proteins were identified, the categorization as per their ontology and function was conducted with BLAST2GO ([www.blast2go.com](http://www.blast2go.com)).

## Antioxidative enzyme assays

The activities were conducted in five replicates of already-obtained samples of four-plant pools (S1 Table). The bark tissue was macerated in liquid nitrogen and homogenized in 800  $\mu\text{L}$  of potassium phosphate buffer. K-P buffer was prepared by mixing 50  $\text{mmol}\cdot\text{L}^{-1}$   $\text{KH}_2\text{PO}_4$ , and 50  $\text{mmol}\cdot\text{L}^{-1}$   $\text{K}_2\text{HPO}_4$  and pH was adjusted to 7.0.

Catalase (CAT) activity was dosed at 30°C with the use of a reaction buffer containing sodium phosphate at 50  $\text{mmol}\cdot\text{L}^{-1}$  (pH 7.0) with addition of 1  $\mu\text{L}$  of the vegetable extract. The reaction was initiated through the addition of  $\text{H}_2\text{O}_2$  at 30  $\text{mmol}\cdot\text{L}^{-1}$  and readings were conducted by calculating the absorbance decay at 240 nm for 300 s against a vegetable extract-free blank. The activity was expressed in  $\text{mmol}\ \text{H}_2\text{O}_2\cdot\text{gMF}^{-1}\text{min}^{-1}$ .

Superoxide dismutase activity was determined as per Gianopolitis and Ries [19], with a few adaptations. According to that method, the activity is performed by taking into account the inhibited reduction of NBT (nitro blue tetrazolium) by the enzyme extract. The crude extract was added to the extraction buffer containing potassium phosphate buffer (50  $\text{mmol}$  (50  $\text{mmol}\cdot\text{L}^{-1}$ , pH 6.0), EDTA (1  $\text{mmol}\cdot\text{L}^{-1}$ ) and methionine (13 $\text{mmol}\cdot\text{L}^{-1}$ ). The activity was initiated with the addition of riboflavin (1  $\text{mmol}\cdot\text{L}^{-1}$ ). The first reading was performed in the dark for 5 minutes and the second one was performed after the reaction was submitted to a 15-w fluorescent light for another 5 minutes. Both readings were performed at 560 nm. The wells were considered as blank when they did not contain crude vegetable extracts.

Guaiacol Peroxidase (GPX) activity was performed according to the methodology described by Rehem *et al.* [20], with some modifications. The activity buffer used was composed of sodium phosphate at 20  $\text{mmol}\ \text{L}^{-1}$  (pH 6.0), 40  $\text{mmol}\ \text{L}^{-1}$  of guaiacol and hydrogen peroxide at 0.06%. 1  $\mu\text{L}$  of the previously diluted extract was added to that solution. The absorbance readings were performed at a 470 nm wavelength at 25°C. GPX activity was expressed according to the increased guaiacol consumption in  $\mu\text{mol}\ \text{s}^{-1}\ \text{g}^{-1}$  of fresh biomass, from a standard curve as prepared by Rehem *et al.* [20].

The inhibiting effect of ascorbic acid (AsA) concerning guaiacol peroxidase (GPX) was performed according to Khan and Robinson [21]. The reaction was performed with 10, 20 e 30  $\text{mmol}\ \text{L}^{-1}$  ascorbic acid. In this case, GPX activity can be retarded with the presence of ascorbic acid, a competing substrate.

## Statistical analyses

After the enzyme assays and the gene expression through RT-qPCR were conducted, the averages were submitted to Tukey statistical test, taking into account p values  $\leq 0.05$ . The tests were conducted with the use of software Bio Estat v 5.3.

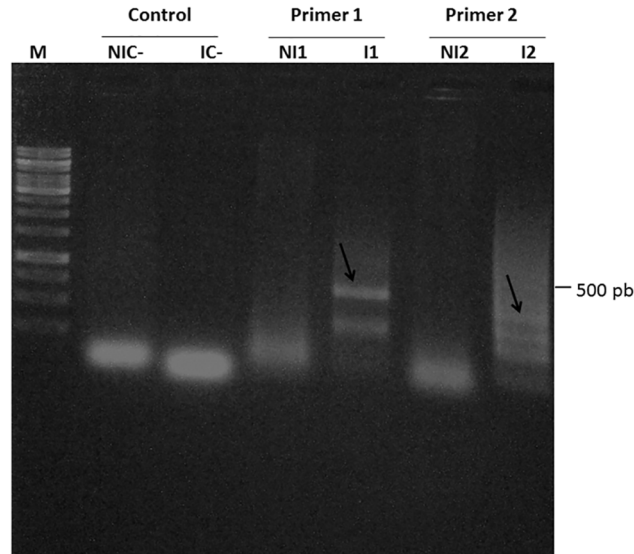

**Fig 1. Amplification of CTV viral particles through RT-PCR in order to confirm the presence of the virus in infected samples, and to confirm its absence in non-infected samples.** M, molecular weight marker; NIC- and IC-, negative controls of the reaction for each of the primers (1 and 2). NI1 and I1, non-infected and infected samples (primer 1—CN487/489), respectively. NI2 e I2, non-infected and infected samples (primer 2—CN488/491), respectively. The arrows show the amplified bands as per their expected sizes. The reaction was confirmed in a 1% agarose gel.

doi:10.1371/journal.pone.0130950.g001

## Results

### Phenotypic reactions of plants to CTV

To check for CTV presence in infected and non-infected plants, respectively, samples were analyzed through PCR. Viral protein capsule segments were amplified through RT-PCR in infected samples, but there were no amplification in non-infected samples (Fig 1). In regards to the symptoms, according to the evaluation through the use of the rating scale, infected tree branches presented sparse stem pitting throughout their stem branches (S1 Fig).

### Differentially expressed proteins analyses and functional classifications

Branch bark proteins in CTV-infected and non-infected citrus plants of Westin variety were separated in 2D gels. The non-infected sample presented 604 spots total, of which 158 were exclusive; in the infected sample, a total of 618 spots were identified, 144 of which exclusive. The two treatments shared 460 spots. A total of 50 differentially-expressed spots (Fig 2A and 2B) (S2 Table) were processed, and 40 were identified through mass spectrometry. Among those, 32 were upregulated in infected samples (including 22 exclusives), and 8 were down regulated. Those spots are described in Table 2 with their corresponding proteins. Differential proteins were classified in five categories, taking into account their differential expression level (Fig 3).

Among identified proteins, 86% presented a higher expression level (up-accumulated) in the sample infected with CTV. Among them, proteins related to biotic stress in plants especially stand out, such as chitinase (spots 104 and 105). Another example of high expression level happened with the protein related to abscisic acid (spot 62). That protein presented a high expression level in plants submitted to biotic stress (CTV-infected). Some proteins involved with the redox process were identified; two of them stand out, Catalase (spot 323) and

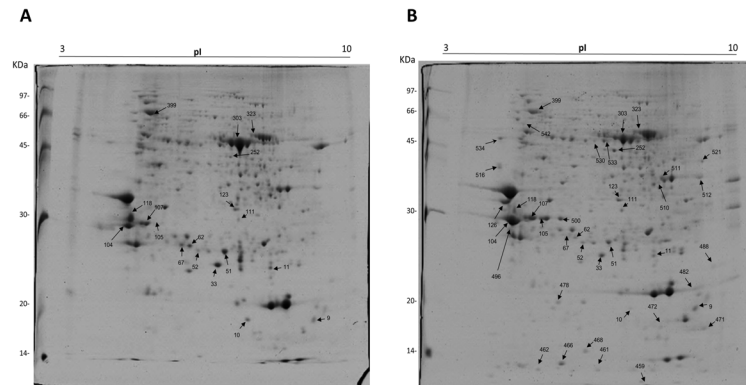

**Fig 2. Protein Profile.** Differential profile (according to the statistical analysis performed by the software) of the expression of identified proteins between non infected (A) and infected (B) treatments of “Westin” sweet orange.

doi:10.1371/journal.pone.0130950.g002

superoxide dismutase (spots 33 and 52). Catalase (CAT) presented an expression ratio of -0.08, when infected and non-infected samples were compared. In turn, superoxide dismutase (SOD) presented an expression ratio of 0.85 for spot 33 and 1.20 for spot 52. CAT expression level was reduced in infected samples. For SOD, in turn, its expression was higher in those samples.

Some proteins involved in cell function presented low expression level, among which Photosystem I Protein stands out. It acts in the photosystem reaction core (spot 9). Proteins Hsc70 (spot 399) and Hsp19 (spot 10) also presented low expression level.

The identified proteins were separated in five different groups according to predicted functions (Fig 4A). Most of those proteins (27%) are involved in the performance of molecular functions, 10% of them are involved in catalytic activities, 23% are involved in defense and stress responses, 19% are involved in cell metabolism, and 21% of them are involved in redox activities. Besides that, those proteins were also separated by taking into account their locations in cell organelles (Fig 4B). Most proteins are located in the mitochondria (30%), 20% are located in the endoplasmic reticulum, 20% is located in the chloroplasts. The proteins located in the nucleus, in the cytoplasm, and in the membranes total 10% in each category.

A viral protein was identified in spots 459 and 461. For spot 459, three peptides were sequenced through mass spectrometry, totaling 51 amino acids. For spot 461, a peptide was found that was common to the one found in spot 459, and it contained a total of 19 amino acids, corresponding to the central region of a viral capsule protein with 223 amino acids. The 51 amino acids cover 22.8% of the viral protein capsule with 100% identity.

### Antioxidant enzyme activities

The activity of some enzymes with a protection potential against the oxidative stress was analyzed in the two treatments, and some significant differences were observed. From the analyzed enzymes, only CAT presented an activity which was 0.2x higher in the non-infected sample, but the difference was not significant. SOD and GPX presented a higher activity in the infected sample, 2x and 1x higher, respectively (Fig 5A–5C). In turn, in regards to APX activity, which was measured as per the preferential use of substrates, in 10 mmol.L<sup>-1</sup> of AsA (Fig 6A), the elevation of ABS470 started at 33 seconds for non-infected samples. For the infected ones, it started at 20 seconds. In a medium containing 20 mmol.L<sup>-1</sup> of AsA (Fig 6B), the enzyme activity with guaiacol initiated at 74 seconds for non-infected samples and at 25 seconds for infected samples. Finally, with a concentration of 30 mmol.L<sup>-1</sup> of AsA (Fig 6C) at 470 nm, the enzyme

**Table 2. Differentially expressed proteins among infected and non-infected samples of “Westin” sweet orange, identified through Mass Spectrometry (ms/ms).**

| Spot | Accession    | Specie                       | Protein ID                                              | Sequence Coverage | Mowse Score | Theoretical pI/MM (KDa) | Number of matched peptides |
|------|--------------|------------------------------|---------------------------------------------------------|-------------------|-------------|-------------------------|----------------------------|
| 9    | gi 157678948 | <i>Citrus sinensis</i>       | PS1 reaction center subunit III                         | 29                | 178         | 9.59/15249              | 4                          |
| 10   | gi 30575572  | <i>Citrus paradise</i>       | HSP19 class I                                           | 32                | 122         | 9.87/6430               | 2                          |
| 11   | gi 116643152 | <i>Citrus sinensis</i>       | stress-related protein                                  | 62                | 577         | 5.67/17593              | 14                         |
| 33   | gi 77417707  | <i>Citrus maxima</i>         | SOD Superoxidedismutase                                 | 18                | 156         | 6.03/15577              | 3                          |
| 51   | gi 310772392 | <i>Malpighia glabra</i>      | Dehydroascorbatereductase                               | 14                | 97          | 6.40/23725              | 3                          |
| 52   | gi 195548074 | <i>Citrus maxima</i>         | Ironsuperoxidedismutase                                 | 23                | 248         | 5.16/18168              | 4                          |
| 62   | gi 309774081 | <i>Citrus sinensis</i>       | Abscisic acid stress ripening-related protein           | 11                | 64          | 5.75/20038              | 1                          |
| 67   | gi 557549110 | <i>Citrus clementina</i>     | Carbonic Anhydrase                                      | 11                | 60          | 5.80/28628              | 2                          |
| 104  | gi 1220144   | <i>Citrus sinensis</i>       | Chitinase                                               | 44                | 567         | 5.06/32450              | 21                         |
| 105  | gi 1220144   | <i>Citrus sinensis</i>       | Chitinase                                               | 12                | 65          | 5.06/32459              | 2                          |
| 107  | gi 508699354 | <i>Theobroma cacao</i>       | Photosystem II subunit O-2                              | 21                | 476         | 5.85/35364              | 9                          |
| 111  | gi 557528152 | <i>Citrus clementina</i>     | Xyloglucan endotransglycolilase                         | 25                | 167         | 6.31/33283              | 5                          |
| 118  | gi 11596188  | <i>Citrus paradise</i>       | Lectin-related protein precursor                        | 44                | 617         | 5.10/29300              | 16                         |
| 123  | gi 114329641 | <i>Citrus sinensis</i>       | ATP synthase CF1 alpha subunit                          | 17                | 493         | 5.68/35509              | 9                          |
| 126* | gi 1220144   | <i>Citrus sinensis</i>       | Chitinase                                               | 9                 | 104         | 5.06/32459              | 1                          |
| 252  | gi 508717796 | <i>Theobroma cacao</i>       | Calreticulin 3 isoform 1                                | 8                 | 99          | 6.12/50007              | 2                          |
| 303  | gi 114329664 | <i>Citrus sinensis</i>       | Ribulose 1,5-bisphosphate carboxylase/oxygenase         | 38                | 1054        | 6.29/52999              | 39                         |
| 323  | gi 262192812 | <i>Citrus maxima</i>         | Catalase                                                | 29                | 299         | 6.00/38716              | 8                          |
| 399  | gi 762844    | <i>Solanum lycopersicum</i>  | Hsc70                                                   | 7                 | 211         | 5.18/71869              | 4                          |
| 459* | gi 304565    | <i>Citrus tristeza virus</i> | Coat protein                                            | 7                 | 170         | 6.84/13001              | 1                          |
| 461* | gi 304565    | <i>Citrus tristeza virus</i> | Coat protein                                            | 10                | 113         | 5.37/13384              | 4                          |
| 462* | gi 87299377  | <i>Citrus jambhiri</i>       | Miraculin-like protein 2                                | 15                | 87          | 5.61/24447              | 3                          |
| 466* | gi 2274917   | <i>Citrus sinensis</i>       | Cu/Zn superoxidedismutase                               | 23                | 253         | 5.82/12777              | 5                          |
| 468* | gi 255571035 | <i>Ricinus communis</i>      | Nucleoside diphosphate kinase                           | 11                | 103         | 6.30/16301              | 4                          |
| 471* | gi 449441230 | <i>Cucumis sativus</i>       | Peroxiredoxin Q, chloroplastic-like                     | 19                | 59          | 9.70/23678              | 3                          |
| 472* | gi 462403124 | <i>Prunus persica</i>        | CBS domain-containing protein CBSX3, mitochondrial-like | 15                | 60          | 9.21/22744              | 2                          |
| 478* | gi 116643152 | <i>Citrus sinensis</i>       | Stress-related protein                                  | 41                | 286         | 5.67/17593              | 4                          |

(Continued)



Table 2. (Continued)

| Spot | Accession    | Specie                        | Protein ID                                             | Sequence Coverage | Mowse Score | Theoretical pI/MM (KDa) | Number of matched peptides |
|------|--------------|-------------------------------|--------------------------------------------------------|-------------------|-------------|-------------------------|----------------------------|
| 482* | gi 119367468 | <i>Citrus hybrid cultivar</i> | Miraculin-like protein 2                               | 21                | 121         | 8.18/23610              | 3                          |
| 488* | gi 146454508 | <i>Sonneratia alba</i>        | 60S ribosomal protein large subunit 9                  | 8                 | 85          | 9.70/20965              | 1                          |
| 496* | gi 151547430 | <i>Citrus sinensis</i>        | Cysteine protease Cp                                   | 20                | 183         | 6.25/40045              | 4                          |
| 500* | gi 222875436 | <i>Gossypium hirsutum</i>     | Gibberellin 20-oxidase                                 | 2                 | 67          | 6.11/43094              | 2                          |
| 510* | gi 557532346 | <i>Citrus clementina</i>      | Bisphosphate aldolase cytoplasmic isozyme-like         | 7                 | 95          | 6.96/36597              | 2                          |
| 511* | gi 557532346 | <i>Citrus clementina</i>      | Fructose-bisphosphatealdolase cytoplasmic isozyme-like | 45                | 507         | 6.96/36597              | 11                         |
| 512* | gi 557536631 | <i>Citrus clementina</i>      | Peroxidase 12-like                                     | 25                | 343         | 8.55/38106              | 6                          |
| 516* | gi 147790682 | <i>Vitis vinifera</i>         | Cysteine proteinase RD21a-like                         | 7                 | 97          | 5.10/52761              | 4                          |
| 521* | gi 42561300  | <i>Mycoplasma mycoides</i>    | Prolipoprotein                                         | 1                 | 62          | 9.13/83310              | 2                          |
| 530* | gi 557522891 | <i>Citrus clementina</i>      | Adenosylhomocysteinase-like                            | 5                 | 69          | 5.84/53686              | 2                          |
| 533* | gi 490329921 | <i>Klebsiella pneumoniae</i>  | 2'-5' RNA ligase                                       | 18                | 66          | 6.34/52111              | 9                          |
| 534* | gi 557535644 | <i>Citrus clementina</i>      | Calreticulin-like                                      | 18                | 89          | 4.69/41373              | 3                          |
| 542* | gi 134101    | <i>Ricinus communis</i>       | Rubisco                                                | 6                 | 98          | 4.77/52461              | 2                          |

\* Exclusives Spots from Infected Samples

The peptides were sequenced through ms/ms

Score corresponding to the coverage value, as calculated by Mascot.

doi:10.1371/journal.pone.0130950.t002

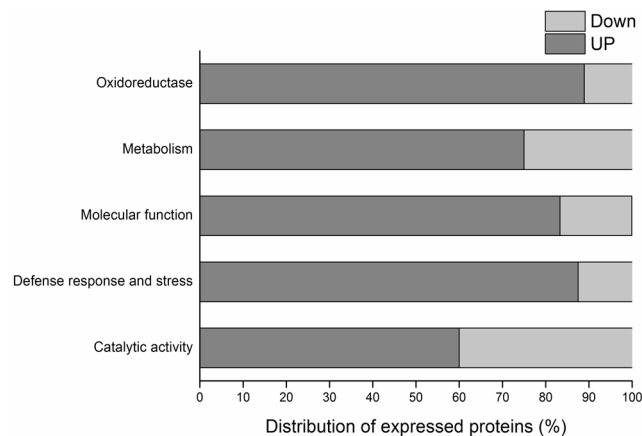

Fig 3. Distribution of differentially-expressed proteins of sweet orange variety “Westin” in response to *Citrus tristeza virus* (CTV), according to their expression levels. The gray segment of the bar corresponds to up-accumulated proteins and in light gray, the down-accumulated ones.

doi:10.1371/journal.pone.0130950.g003

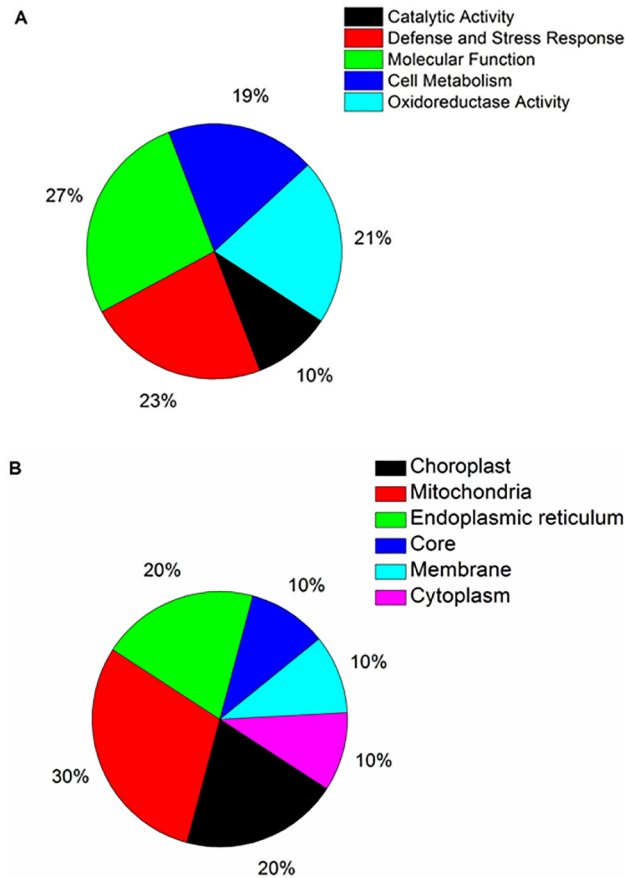

**Fig 4. Functional categorization and cell location of identified differentially expressed proteins in infected and non-infected sweet orange variety “Westin” subjects.** A, Functional categorization of significantly different proteins. B, Cell location of differentially expressed proteins.

doi:10.1371/journal.pone.0130950.g004

activity was observed in non-infected samples at 200 seconds and at 149 seconds, approximately, in infected samples. In all concentrations, the use of guaiacol as an electron donor was first started in CTV-infected samples.

### RT-qPCR

The relative expression levels of the genes of some of the enzymes involved in the oxidative stress were evaluated. The expression levels of the genes which code those enzymes were higher

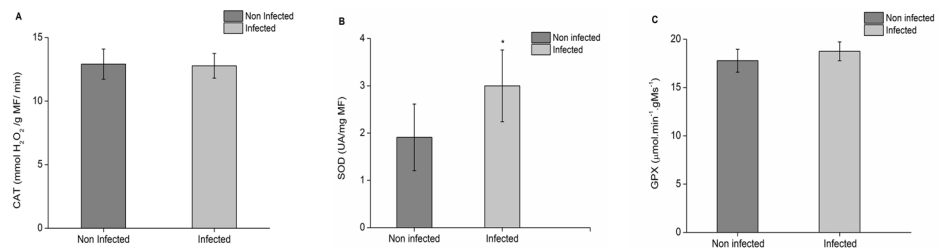

**Fig 5. Enzyme activity in “Westin” sweet oranges infected and non-infected with CTV.** A, Catalase B, Superoxide Dismutase C, Guaiacol Peroxidase. The vertical columns indicate the average absorbance values (n = 4). The bars above the columns represent the standard error of averages. The asterisk (\*) indicates that the values presented a significant difference through Tukey test, taking into account  $p \leq 0.05$ .

doi:10.1371/journal.pone.0130950.g005

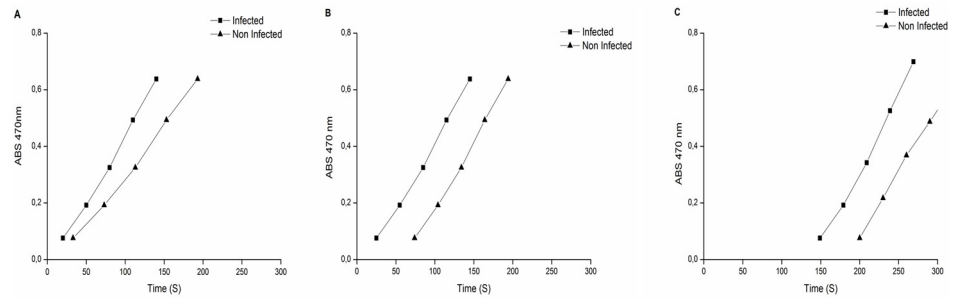

**Fig 6. Peroxidase activity in “Westin” sweet orange infected and non-infected with CTV, with the use of ascorbic acid and guaiacol as electron donors. A, B, and C** AsA—exhaustion times in the reaction at 10 mmol.L<sup>-1</sup>, 20 mmol.L<sup>-1</sup> and 30 mmol.L<sup>-1</sup>, respectively. The arrows indicate the times at which GPX activity was started.

doi:10.1371/journal.pone.0130950.g006

for CTV-infected plants. APX accumulation in the infected samples increased twofold as compared to the non-infected samples. The accumulation of the transcript which codes GPX was almost three times as high in the infected samples. The accumulation of SOD transcript was twice as high in the infected samples, whereas the expression of CAT gene was reduced in 0.5 times in the infected samples (Fig 7).

## Discussion

### Proteomic analyses

The viral infection promotes many changes in the protein profile of plants [22]. Our results with *Citrus tristeza virus*-infected and non-infected samples of “Westin” sweet orange showed interesting alterations. In this case, besides the presence of exclusive spots for each sample, 23 spot were also detected, with different expression levels, which indicated the induced and repressed accumulation of proteins in the virus presence. Similarly, Giribaldi *et al.* [23] analyzed proteomic alterations caused by viruses which were restricted to *Vitis vinifera* phloem,

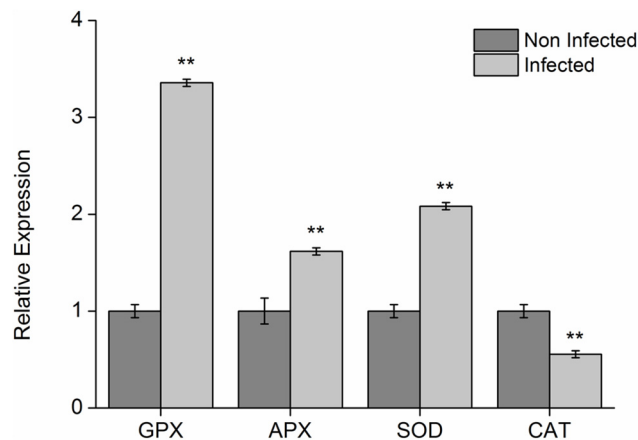

**Fig 7. Analysis of the accumulation of transcripts of the genes encoding enzymes involved in oxidative stress in sweet orange variety “Westin” plants infected and non-infected with CTV.** The columns marked with \*\* indicate that the values among treatments presented significant differences through Tukey test ( $p \leq 0.001$ ). The vertical columns indicate the average values of Cts which were calculated through method  $2^{-\Delta\Delta Ct}$  (LIVAK E SCHMITTGEN, 2001), the bars above the columns indicate the standard error of averages.

doi:10.1371/journal.pone.0130950.g007

and found 400 spots in total, of which only 19 had differential expression levels. In this study, no exclusive spots were identified.

The differences found in samples which were either infected by a pathogenic virus or not may be related to stress and defense responses, as they play an important role during cell infection processes. The proteomic analysis of the interaction between plants which are resistant and susceptible to sugarcane virus showed that a great part of identified proteins was mainly related to stress and defense [22], but no exclusive spots were identified, only two differentially expressed spots. On the other hand, Cantú *et al.* [7], when performing a study with citrus plant barks which were both affected and unaffected by “Sudden Death in Citrus”, observed a difference in protein patterns of analyzed samples. The authors found exclusive proteins in infected and non-infected samples, but found no common proteins with significant differential expression levels.

### Proteins involved with catalytic activity, photosynthesis and metabolism

Most studies with proteomic analyses of plants infected by microorganisms find reduced accumulation of proteins which are involved in photosynthesis [24,25]. According to Monavarfeshani *et al.* [26], it happens because when a plant is submitted to the attack of a virus or of any other microorganism, it tends to first dedicate to the production of compounds related to the response to the stress caused by that attack, and those rates only come back to normal when the micro-organism stops growing. It is also important to point out that a pathogen such as CTV, lodged in the phloem, may affect the flow of photoassimilates and, hence, inhibit the photosynthesis. In that study, RuBisCO (spot 303) showed an expression level which was significantly reduced (down-accumulated). *1,5-bisphosphate carboxylase oxigenase* (RuBisCO) is an important enzyme, due to the fact it helps plants assimilate carbon dioxide and catalyzes the reaction which breaks CO<sub>2</sub> and facilitates its assimilation in its organic form [27]. The difference in the accumulation of the RuBisCO protein, found in this study, suggests that its expression is affected due to the stress which is caused by the infected status with the virus. Grapefruits infected with *Candidatus Liberibacter asiaticus* (Las), a bacterium that is restricted to citrus phloem, which causes the *Huanglongbing* (HLB) disease, also presented a reduced accumulation of RuBisCO [28].

In transgenic tomato leaves infected with the *Cucumber mosaic virus*- CMV, most proteins which presented different expression levels were related to photosynthesis. Among them, RuBisCO, which presented itself as down-accumulated [29].

The protein of sub-unit II of photosystem reaction center I (PSI) (spot 9) and the protein of sub-unit O2 of photosystem II (PSII) (spot 107) were found to be down-accumulated in infected plants. Those proteins are related to photosynthesis reaction sites, and they are responsible for the conversion of luminous energy into chemical energy [30]. Although the accumulation level of those proteins is expected to be reduced, as a defense response of the plant against pathogens, the opposite happened. In this case, the presence of the virus may be inducing the expression of those proteins for their own benefit. Consequently, the photosynthetic yield of those plants is not affected, which keeps the plant alive [31]. On the other hand, the increase of some proteins may take place, so the plant can make up for the reduction of other proteins. Besides that, the increase of a protein not always implies the increase of a process [22]. *C. sinensis* plants infected with *Xanthomonas axonopodis* were studied with the use of classic proteomics as a tool [31]. In plants which were infected with recombinant bacteria, the symptoms were far more severe, and the accumulation of proteins related to photosynthesis increased, instead of decreasing. It suggested a molecular mimicry, with the pathogen inducing the expression of those proteins, and consequently increasing photosynthesis rates for its own

benefit. More specific studies may clarify whether something similar happens due to CTV action in citrus plants.

Regarding the proteins that are involved in cell metabolism, ATP synthase (spot 123) was identified to be up-accumulated in CTV-infected plants. It is a key enzyme for ATP production, as it catalyzes ADP phosphorylation [32]. Several important enzymes, involved with energy production and cell metabolism generally are found to have reduced accumulation level in processes involving the host/pathogen interaction, as it happens with plants infected with bacteria, for example [33], which indicates a likely response from the microorganism virulence, and consequently, a positive feedback for its benefit.

## The presence of proteins related to Biotic Stress

The infection of sweet oranges by CTV resulted in an increased accumulation of some proteins involved with stress and defense responses against pathogens. The protein related to stress (spot 11) was found to be up-accumulated after virus infection. That protein is activated when the plant is submitted to pathogen attacks [33]. Other proteins involved with stress responses were highlighted in this study, as they were found to be up-accumulated in infected samples. Among those proteins, the one related to abscisic acid (spot 62), to chitinase (spots 104 and 105), to Hsp19 protein (Spot 10), and Lectin-precursor protein (spot 118).

An up-accumulated protein related to ABA (abscisic acid) stress was identified, and therefore, the action of that hormone may have been affected by the virus presence. ABA is a phytohormone which is present in all plants. It is directly related to retarded or accelerated development of vegetables, depending on the environmental conditions that they are submitted to, especially in stress situations like drought stress [34]. ABA is also related to biotic stress, and it operates mainly in responses to both kinds of stress, once the responses against biotic and abiotic stresses may take place simultaneously [35]. In maize infected with sugarcane mosaic virus, that protein was induced, although its biological role is not very known yet [22]. Its super expression in transgenic tobacco increased the tolerance to salinity [36].

Two chitinases were identified in spots 104 and 105 (Fig 3) as up-accumulated. Chitinase regulation is induced by several factors, including pathogen attacks and abiotic stresses involving heavy metals or vegetable hormones, and they are responsible for the hydrolysis of chitin polymer, which is present in several organisms [37]. Those proteins, as well as others related to stress responses play an important role against specific pathogens [38]. In plants infected with the pepper virus, four different types of up-accumulated chitinases were identified, with acid and basic isoelectric points [39]. Chitinase induction is generally present with the induction of other stress-related proteins (PR) [37].

The lectin precursor protein (spot 118) was found to be up-accumulated (2x) in the infected sample. It highlights the fact that the virus is restricted to the phloem, and it consequently causes tissue damage. Lectins belong to a protein group which plays several roles in vegetable cells, and they may be found in several organisms besides plants. One of their main roles is related to the differentiation of vascular tissues, and their ability to bind to several sugar molecules. Those characteristics may be related to phloem regeneration as a response against the attack of microorganisms or insects which may feed from that tissue [40]. The ability to bind to several different molecules may be one of the reasons for the expression of this protein during a viral infection process, and it may interact with the viral RNA molecule, preventing its action and consequently preventing the infection progression [41]. A recombinant lectin from *Musa paradisiaca* exhibited effects on *Tobacco mosaic virus* (TMV). It may prevent TMV infection and maintain relatively normal physiological parameters such as chlorophyll content, photosynthetic rates and enhanced antioxidant activities [42]. That was also proved in bacteria by

Kim *et al.* [43], who showed that the presence of a lectin-related protein resulted in the blockage of the *C. Liberibacter asiaticus* bacterium translocation, infecting sweet orange *C. sinensis*.

### Proteins related to Oxidative stress

Some proteins related to the presence of oxidative stress in plants were identified. Among those enzymes, SOD, CAT and the peroxidases stand out. Superoxide dismutase (spot 33) and iron-dependent superoxide dismutase (spot 52) were shown to be up-accumulated in infected samples. In turn, catalase (spot 323) was found to be down-accumulated. This may have occurred because probably the damage was localized in chloroplasts whereas the CAT enzyme is absent from chloroplasts and is localized in peroxisomes [44]. Regarding aerobic organisms, the production of reactive oxygen species (ROS) invariably happens, and that may be intensified when the organism is submitted to a kind of stress. Some enzymes are recruited to attack the ROS and regulate cell function [45].

SOD is an enzyme which has the ability to catalyze  $O_2^-$  dismutation, producing  $O_2$  and  $H_2O_2$  [45]. In turn, catalase is responsible for decomposing  $H_2O_2$  into water and molecular oxygen ( $O_2$ ). Those enzymes are related to the infection and to oxidative stress tolerance in plants [46,47]. SOD enzyme activity was higher in infected samples, as well as the expression level of the gene which codes it. In turn, CAT activity presented differences, but the gene expression level was higher in the infected treatment. According to Govrin and Levine [48], the repression of enzymes related to peroxide decomposition may facilitate the development and the virulence of pathogens. Besides that, such result also suggests that, so far, the responses to oxidative stress are more complex than a simple increase or decrease in the expression level of antioxidant enzymes [22].

The peroxidase activity was evaluated in regards to the use of two substrates, guaiacol and ascorbate. Those two compounds act as electron-donor substrates for the degradation of  $H_2O_2$  by ascorbate peroxidase (APX) and guaiacol peroxidase (GPX) enzymes, generating  $H_2O$  [49]. In all ascorbate concentrations used, the depletion of that substrate and the starting of the use of guaiacol in the reaction medium first started in Tristeza virus-infected samples, indicating that APX-type peroxidases predominate in infected plants. AsA presence in meristematic tissues was observed to prevent the peroxide coming from the extracellular medium from entering, until it has been fully consumed inside the cell. Besides that, AsA presence inhibits guaiacol peroxidase activity [50].

### Proteins related with the growth and metabolism of viruses

A virus capsule-related protein was detected, and it suggested increased titration of the virus in Tristeza virus-infected sweet oranges. The estimated masses for spots 459 and 461 are 13.001 and 13.384 kDa, respectively, along with the presence of the central peptide, indicating that both spots resulted from proteolytic cleavages in N and C terminuses of the protein in the capsule (gi|304565), whose total estimated mass is 24.930 kDa. 2D-PAGEs reveal that the sample collection and extraction methods were efficient to preserve the integrity of proteins. The spots which correspond to the protein in the capsule may result from the action of the plant defense proteases. The detection of that protein which composes the viral protein capsule may be considered as compatible with the fluting degree which was observed in sampled plant branches. Those results suggest that “Westin” sweet orange may not be tolerant to the virus, which highlights that the infection is reaching levels which may reduce productivity and consequently cause economic losses. *Nicotiana spp.* and *Arabidopsis thaliana* plants also presented a protein which is related to the protein in the capsule of an unknown virus [51], as well as *N.*

*bentamiana* plants infected with *Pepper mild mottle tobamovirus* [52], but Cantú *et al.* [7] and Wu *et al.* [22] could not identify any pathogen protein in their studies.

The viruses invariably have an intracellular nature. Thus, their proteins and nucleic acids can interact and influence the protein activity of the hosts after their attack. Those viral proteins build up, and, many times, they suppress the defense of their hosts, which, in turn, suffer from systemic infections as those accumulated proteins having functions which facilitate the invasion throughout the infected plants [53].

## Conclusions

In this study, it was demonstrated that sweet orange variety “Westin” responds to the presence of CTV with variations in its protein profile, and in the expression of specific genes. The CTV infection induced an increased oxidative stress, as the activity of antioxidant enzymes was higher in the infected sample, as well as the expression of genes which correspond to SOD, GPX, and APX. “Westin” variety uses AsA as its preferential electron donor. According to the fluting detected on infected plants, along with the detection of proteins from CTV capsule, which was detected in two-dimensional gels, the tolerance of “Westin” variety to *Citrus tristeza virus* is made questionable. Our results suggest that these plants contain proteases which act in the defense by cleaving proteins which compose the viral capsule.

## Supporting Information

**S1 Fig. Symptom of stem pitting.** Infected branches with the symptoms characterized by the presence of sparse stem pitting throughout their stems. The arrows show the presence of stem pitting.

(PDF)

**S2 Fig. Replicate of two dimensional gel of non-infected sample.** 2D gels of non- infected samples to increase the reproducibility of the analysis.

(PDF)

**S3 Fig. Replicate of two dimensional gel of infected sample.** 2D gels of infected samples to increase the reproducibility of the analysis.

(PDF)

**S1 Table. Dataset underlying the results.** Spreadsheet containing all raw data about the Enzyme Activities and RT-qPCR.

(XLSX)

**S2 Table. Identified Proteins.** Table containing additional information about the proteins that were identified and ms/ms data.

(PDF)

## Author Contributions

Conceived and designed the experiments: CPP CJB MGCC ASG. Performed the experiments: MSD AOS ACOF RMS. Analyzed the data: MSD AOS CPP. Contributed reagents/materials/analysis tools: CPP ASG CJB. Wrote the paper: MSD CPP ASG MGCC.

## References

1. ABECITRUS (2012) Brazilian Association for Citrus Exporters. Available: <http://www.abecitrus.com.br>. 26 March 2012.

2. CITRUSBR (2013) Brazilian Association for Citrus Exporters. Available: <http://www.citrusbr.com>. Acesso em 10 de abril de 2013.
3. Moreno P, Ambrós S, Albiach-Martí MR, Guerri J, Peña L (2008) *Citrus tristeza virus*: a pathogen that changed the course of the citrus industry. *Molecular Plant Pathology*. 9: 251–268. doi: [10.1111/j.1364-3703.2007.00455.x](https://doi.org/10.1111/j.1364-3703.2007.00455.x) PMID: [18705856](https://pubmed.ncbi.nlm.nih.gov/18705856/)
4. Feichtenberger E, Müller GW, Guirado N. Doenças das Plantas Cultivadas (1997) Manual de Fitopatologia. 2: 706.
5. Bordignon R, Filho H PM, Muller GW, Siqueira WJ (2003) A tristeza dos citros e suas implicações no melhoramento genético de porta-enxertos. *Bragantia*. 62:345–355.
6. Tanaka FAO, Kitajima EW, Machado MA, Machado SR (2009) Ontogênese de caneluras em pedúnculo de flores de laranja doce infectados pelo vírus da tristeza dos citros estirpe “Capão Bonito”. *Summa Phytopathol*. 35: 316–321.
7. Cantú MD, Mariano AG, Palma MS, Carrilho E, Wulff NA (2008) Proteomic Analysis Reveals Suppression of Bark Chitinases and Proteinase Inhibitors in Citrus Plants Affected by the Citrus Sudden Death Disease. *Phytopathology*. 98:1084–1092.
8. Apel K, Hirt H (2004) Reactive oxygen species: Metabolism, oxidative stress, and signal transduction. *Annual Review plant biotechnology*. 55: 373–399.
9. Bulbovas P, Rinaldi MCS, Deliti WBC, Domingos M (2005) Variação sazonal em antioxidantes em folhas de plantas jovens de *Caesalpinia chinata* Lam. (pau-brasil) *Revista Brasileira de Botânica*. 28: 687–696.
10. Bar-Joseph M, Marcus R, Lee RF (1989). The continuous challenge of *Citrus tristeza virus* control. *Annual Review of Phytopathology*. 27:291–316.
11. Albiach-Martí MR, Mawassi M, Gowda S, Satyanaryana T, Hilf ME, Shanker S et al. (2000) Sequences of *Citrus tristeza virus* separated in time and space are essentially identical. *Journal of virology*. 74: 6856–6865. PMID: [10888625](https://pubmed.ncbi.nlm.nih.gov/10888625/)
12. Meissner Filho PE, Soares Filho WS, Velame KVC, Diamantino EP (2002) Reação de porta-enxertos híbridos ao *Citrus tristeza virus*. *Fitopatologia Brasileira*. 27: 312–315.
13. Roy A, Manjunath KL, Brlansky RH (2005) Assessment of sequence diversity in the 5'-terminal region of *Citrus tristeza virus* from India. *Virus Research*. 113: 132–142. PMID: [15963592](https://pubmed.ncbi.nlm.nih.gov/15963592/)
14. Livak SKJ, Schmittgen TD (2001) Analysis of Relative Gene Expression Data Using Real-Time Quantitative PCR and the 2<sup>-</sup>DDCT. *Method. Methods*. 25: 402–408.
15. Pirovani CP, Carvalho HA, Machado RC, Gomes DS, Alvim FC, Pomella AW et al. (2008) Protein extraction for proteome analysis from cacao leaves and meristems, organs infected by *Moniliophthora perniciosa*, the causal agent of the witches' broom disease. *Electrophoresis*. 29: 391–401.
16. Neuhoff V, Arold N, Taube DE, Ehrhardt W (1988) Improved staining of proteins in polyacrylamide gels including isoelectric focusing gels with clear background at nanogram sensitivity using Coomassie Brilliant Blue G-250 and R-250. *Electrophoresis*. 9: 255–262. PMID: [2466658](https://pubmed.ncbi.nlm.nih.gov/2466658/)
17. Shevchenko A, Tomas H, Havlis J, Olsen JV, Mann I (2006) In-gel digestion for mass spectrometric characterization of proteins and proteomes. *Nat. Protoc*. 1: 2856–2860. PMID: [17406544](https://pubmed.ncbi.nlm.nih.gov/17406544/)
18. Oliveira GAP, Pereira EG, Dias CV (2012) *Moniliophthora perniciosa* Necrosis- and Ethylene-Inducing Protein 2 (MpNep2) as a Metastable Dimer in Solution: Structural and Functional Implications. *PloS one*. 7: e45620. doi: [10.1371/journal.pone.0045620](https://doi.org/10.1371/journal.pone.0045620) PMID: [23029140](https://pubmed.ncbi.nlm.nih.gov/23029140/)
19. Giannopolitis CN, Ries SK (1977) Superoxide Dismutases. II. Purification and quantitative relationship with water-soluble protein in seedlings. *Plant Physiology*. 59: 315–318. PMID: [16659840](https://pubmed.ncbi.nlm.nih.gov/16659840/)
20. Rehem BC, Almeida A-AF, Santos IC, Gomes FP, Pirovani CP, Romero P et al. (2011) Daily and seasonal patterns of leaf water relations and gas Exchange of regulated deficit-irrigated almond trees under semiarid conditions. *Envir. Exp. Bot*. 56: 158–173.
21. Khan AA, Robinson DS (1994) Hydrogen donor specificity of mango isoperoxidases. *Food Chemistry*. 49:407–410.
22. Wu L, Hana Z, Wanga S, Wanga X, Sund A, Zua X et al. (2013) Comparative proteomic analysis of the plant–virus interaction in resistant and susceptible ecotypes of maize infected with sugarcane mosaic virus. *Journal of Proteomics*. 8:124–140.
23. Giribaldi M, Purrotti M, Pacifico D, Santini D, Mannini F, Caciagli P et al. (2011) A multidisciplinary study on the effects of phloem-limited viruses on the agronomical performance and berry quality of *Vitis vinifera* cv. Nebbiolo. *Journal of Proteomics*. 75: 306–315.
24. Scharte J, Schoen H, Weis E (2005) Photosynthesis and carbohydrate metabolism in tobacco leaves during an incompatible interaction with *Phytophthora nicotianae*. *Plant Cell Environment*. 28:1421–1435.



25. Pineda M, Sajani C, Baro N M (2010) Changes induced by the *Pepper mild mottle tobamovirus* on the chloroplast proteome of *Nicotiana benthamiana*. *Photosynth. Res.* 103: 31–45. doi: [10.1007/s11120-009-9499-y](https://doi.org/10.1007/s11120-009-9499-y) PMID: [19823941](https://pubmed.ncbi.nlm.nih.gov/19823941/)
26. Monavarfeshani A, Mirzaei M, Sarhadi E, Amirkhani A, Nekouei MK, Haynes PA et al. (2012) Shotgun Proteomic Analysis of the Mexican Lime Tree Infected with “*Candidatus Phytoplasma aurantifolia*”. *Journal of proteomics.* 12: 785–795.
27. Spreitzer RJ (2002) Rubisco: Structure, Regulatory Interactions and Possibilities for a Better Enzyme. *Plant Biology.* 53: 449–475.
28. Nwugo CC, Huerta AJ (2011) The effect of silicon on the leaf proteome of rice (*Oryza sativa* L.) plants under cadmium-stress. *Journal of Proteome.* 10: 518–528.
29. Di Carli M, Villani ME, Bianco L, Lombardi R, Perrotta G, Benvenuto E et al. (2010) Proteomic Analysis of the Plant-Virus Interaction in Cucumber Mosaic Virus (CMV) Resistant Transgenic Tomato. *Journal of Proteome Research.* 9: 5684–5697. doi: [10.1021/pr100487x](https://doi.org/10.1021/pr100487x) PMID: [20815412](https://pubmed.ncbi.nlm.nih.gov/20815412/)
30. Buttner M, Xie D, Nelson H, Pinther W, Hauska G, Nelson N (1992) Photosynthetic reaction center genes in green sulfur bacteria and in photosystem 1 are related. *Biochemistry.* 89: 8135–8139.
31. Garavaglia BS, Thomas L, Gottig N, Zimaro T, Garofalo CG, Gehring C et al. (2010) Shedding light on the role of photosynthesis in pathogen colonization and host defense. *Communicative & Integrative Biology.* 3: 382–384.
32. Baracca A, Barogi S, Carelli V, Lenaz G, Solaini G (2000) Catalytic activities of mitochondrial ATP synthase in patients with mitochondrial DNA T8993G mutation in the ATPase 6 Gene encoding subunit. *The journal of biological chemistry.* 275: 4177–4182. PMID: [10660580](https://pubmed.ncbi.nlm.nih.gov/10660580/)
33. Nwugo CC, Lin H, Duan Y, Civerolo EL (2013) The effect of ‘*Candidatus Liberibacter asiaticus*’ infection on the proteomic profiles and nutritional status of pre-symptomatic and symptomatic grapefruit (*Citrus paradisi*) plants. *Plant Biology.* 13: 1–24.
34. Kerbauy GB (2004) *Fisiologia vegetal.* Rio de Janeiro: Guanabara Koogan, 452p.
35. Atkinson NJ, Urwin PE (2012) The Interaction of plant biotic and abiotic stresses: from genes to the field. *Journal of Experimental Botany.* 63: 3523–3544. doi: [10.1093/jxb/ers100](https://doi.org/10.1093/jxb/ers100) PMID: [22467407](https://pubmed.ncbi.nlm.nih.gov/22467407/)
36. Kalifa Y, Perlson E, Gilad A, Konrad Z, Scolnik PA, Bar-Zvi D (2004) Over-expression of the water and salt stress-regulated *Asr1* gene confers an increased salt tolerance. *Plant Cell Environ.* 27: 1459–68.
37. Collinge DB, Kragh KM, Mikkelsen JD, Nielsen KK, Rasmussen U, Vad K (1993) Plant chitinases. *The Plant Journal.* 3: 31–40. PMID: [8401605](https://pubmed.ncbi.nlm.nih.gov/8401605/)
38. Kasprzewska A (2003) Plant chitinases-regulation and function. *Cell Molecular Biology.* 8: 809–824.
39. Elvira MI, Galdeano MM, Gilardi P, Garcí A-Luque I, Serra MT (2008) Proteomic analysis of pathogenesis-related proteins (PRs) induced by compatible and incompatible interactions of pepper mild mottle virus (PMMoV) in *Capsicum chinense* L3 plants. *Journal of Experimental Botany.* 59: 1253–1265. doi: [10.1093/jxb/ern032](https://doi.org/10.1093/jxb/ern032) PMID: [18375936](https://pubmed.ncbi.nlm.nih.gov/18375936/)
40. Read SM, Northcote DH (1983) Subunit Structure and Interactions of the Phloem Proteins of *Cucurbita maxima* (Pumpkin). *Journal Biochemistry.* 134: 561–569.
41. Owens RA, Blackburn M, Ding B (2001) Possible Involvement of the Phloem Lectin in Long-Distance Viroid Movement. *Molecular Plant-Microbe Interactions.* 14: 905–909. PMID: [11437264](https://pubmed.ncbi.nlm.nih.gov/11437264/)
42. Liu XY, Li H, Zhang W (2014) The lectin from *Musa paradisiaca* binds wit the capsid protein of tobacco mosaic virus and prevents viral infection. *Biotechnology and Biotechnological Equipment.* 3: 408–416.
43. Kim J, Sagaram US, Burns JK, Li J, Wang N (2009) Response of Sweet Orange (*Citrus sinensis*) to ‘*Candidatus Liberibacter asiaticus*’ Infection: Microscopy and Microarray Analyses. *Phytopathology.* 99: 50–57. doi: [10.1094/PHYTO-99-1-0050](https://doi.org/10.1094/PHYTO-99-1-0050) PMID: [19055434](https://pubmed.ncbi.nlm.nih.gov/19055434/)
44. Singh BK, Sharma SR, Sing B (2010) Antioxidant enzymes in cabbage: Variability and inheritance of superoxide dismutase, peroxidase and catalase. *Scientia Horticulturae.* 124: 9–13.
45. Alscher RG, Erturk N, Heth LS (2002) Role of superoxide dismutases (SODs) in controlling oxidative stress in pant. *Journal of Experimental Botany.* 53: 1331–1341. PMID: [11997379](https://pubmed.ncbi.nlm.nih.gov/11997379/)
46. Zhang Z, Henderson C, Gurr SJ (2004) *Blumeria graminis* secretes an extracellular catalase during infection of barley: potential role in suppression of host defence. *Molecular Plant Pathology.* 5: 537–547. doi: [10.1111/j.1364-3703.2004.00251.x](https://doi.org/10.1111/j.1364-3703.2004.00251.x) PMID: [20565628](https://pubmed.ncbi.nlm.nih.gov/20565628/)
47. Wang ZL, Zhang L-B, Ying S-H, Feng M-G (2013) Catalases play differentiated roles in the adaptation of a fungal entomopathogen to environmental stresses. *Environmental microbiology.* 15: 409–18. doi: [10.1111/j.1462-2920.2012.02848.x](https://doi.org/10.1111/j.1462-2920.2012.02848.x) PMID: [22891860](https://pubmed.ncbi.nlm.nih.gov/22891860/)
48. Govrin EM, Levine A (2000) The hypersensitive response facilitates plant infection by the necrotrophic pathogen *Botrytis cinerea*. *Current biology: CB.* 10: 751–757. PMID: [10898976](https://pubmed.ncbi.nlm.nih.gov/10898976/)

49. Asada K (1999) The water-water cycle in chloroplasts scavenging of active oxigens and dissipation of excess photons. *Annual Review of Plant Physiology and Plant Molecular Biology*. 5: 601–639.
50. Córdoba-Pedregosa MC, González-Reyes JA, Canadillas S, Navas P, Córdoba F (1996) Role of Apoplastic and Cell-wall Peroxidases on the Stimulation of Root Elongation by Ascorbate. *Plant Physiology*. 112: 1119–1125. PMID: [12226436](#)
51. Cooper B, Eckert D, Andon NL, Yates JR, Haynes PA (2003) Investigative proteomics: Identification of an unknown plant virus from infected plants using mass spectrometry. *American Society for Mass Spectrometry*. 14: 736–741.
52. Pineda M, Sajani C, Baro N M (2010) Changes induced by the *Pepper mild mottle tobamovirus* on the chloroplast proteome of *Nicotiana benthamiana*. *Photosynth. Res.* 103: 31–45. doi: [10.1007/s11120-009-9499-y](#) PMID: [19823941](#)
53. Whitham SA, Yang C, Goodin MM (2006) Global Impact: Elucidating Plant Responses to Viral Infection. *Molecular Plant-Microbe Interactions*. 19: 1207–1215. PMID: [17073303](#)
